# Supplementary material for: Engineering stem cell cardiac patch with microvascular features representative of native myocardium
Source: PubMed Central journal article supplement — Theranostics. 2019 Apr 9;9(8):2143–57. doi: 10.7150/thno.29552 (PMC6531308; doi:10.7150/thno.29552), 2019-04-09
Supplement: thnov09p2143s1.pdf [file thnov09p2143s1.pdf]

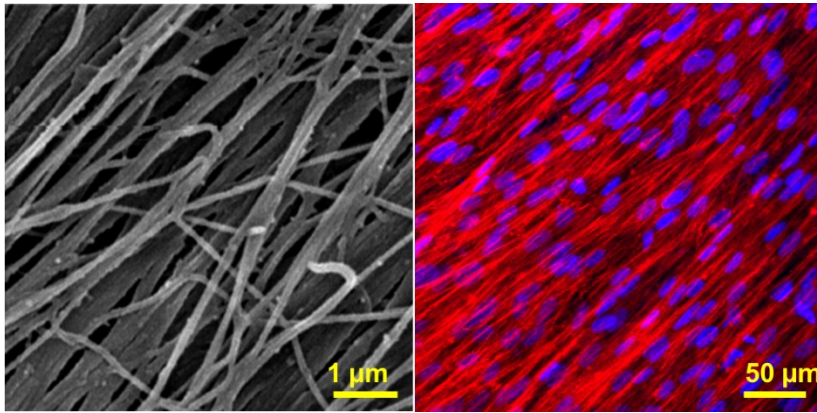

**Supplemental Figure 1.**

A previously derived highly aligned ECM nanofibrous scaffold (left), which directed hMSCs' orientation when they were grown on the nanofibers under 2% oxygen for 7 days (right).

**Supplemental Figure 1.** A previously derived highly aligned ECM nanofibrous scaffold (left), which directed hMSCs' orientation when they were grown on the nanofibers under 2% oxygen for 7 days (right).
